# Supplementary material
Source: publisher site journal article supplement (https://www.dovepress.com/article/559712)
Supplement: Supplementary file 1 [file 559712%20supplementary%20file.docx]

Supplementary S1

# Study on the quality standard of Qingshi anti-itch Ointment

1. Quality Standard Research of Raw and Auxiliary Materials

1.1 Indigo Naturalis

This product is a dried powder, mass, or granule processed from the leaves or stems and leaves of *Baphicacanthus cusia* (Nees) Bremek. (Acanthaceae), *Polygonum tinctorium* Ait. (Polygonaceae), or *Isatis indigotica* Fort. (Brassicaceae). Primary production areas: Fujian, Jiangsu, Yunnan, Anhui, etc. It complies with all specifications under the "Indigo Naturalis" entry on page 185 of *Chinese Pharmacopoeia* (2010 Edition, Part I). Purchased from Beijing Tongrentang (Bozhou) Herbal Pieces Co., Ltd., batch number: 300002729.

1.2 Calcined Calamine

This product is a carbonate mineral of the calcite group, smithsonite, primarily containing zinc carbonate (ZnCO₃). Primary production areas: Hunan, Sichuan, Guangxi, Yunnan, etc. It complies with all specifications under the "Calcined Calamine" entry on page 211 of *Chinese Pharmacopoeia* (2010 Edition, Part I). Purchased from Beijing Shenghuitang Traditional Chinese Medicine Herbal Pieces Co., Ltd., batch number: 13072503.

1.3 Calcined Gypsum

This product is a sulfate mineral of the anhydrite group, gypsum, primarily containing hydrated calcium sulfate (CaSO4·2H2O). Primary production areas: Hubei, Henan, Anhui, Sichuan, Hunan, Shandong, etc. It complies with all specifications under the "Calcined Gypsum" entry on page 88 of *Chinese Pharmacopoeia* (2010 Edition, Part I). Purchased from Beijing Qiancao Traditional Chinese Medicine Herbal Pieces Co., Ltd., batch number: 120404012.

1.4 Sophora Flavescens

This product is the dried root of *Sophora flavescens* Ait. (Fabaceae). Primary production areas: Shanxi, Henan, Hebei, etc. It complies with all specifications under the "Sophora Flavescens" entry on page 188 of *Chinese Pharmacopoeia* (2010 Edition, Part I). Purchased from Beijing Tongrentang (Bozhou) Herbal Pieces Co., Ltd., batch number: 301003666.

1.5 Amur Cork Tree (Phellodendron amurense)

This product is the dried bark of *Phellodendron amurense* Rupr. (Rutaceae). Primary production areas: Liaoning, Jilin, Hebei, Heilongjiang, etc. It complies with all specifications under the "Amur Cork Tree" entry on page 137 of *Chinese Pharmacopoeia* (2010 Edition, Part I). Purchased from Beijing Shenghuitang Traditional Chinese Medicine Herbal Pieces Co., Ltd., batch number: 13061003.

1.6 Borneol

This product is chemically synthesized. It complies with all specifications under the "Borneol" entry on page 136 of *Chinese Pharmacopoeia* (2010 Edition, Part I). Purchased from Beijing Tongrentang (Bozhou) Herbal Pieces Co., Ltd., batch number: 300002106.

1.7 Extra Virgin Olive Oil

This product has been tested and certified as qualified by the Shanghai Institute of Quality Inspection and Technical Research.

1.8 Beeswax

This product complies with the relevant regulations under GH013-82.

2 Quality Standard Research of the Finished Product

2.1 Name

Qingshi anti-itch Ointment

2.2 Formula

Indigo Naturalis 20 g, Calcined Calamine 60 g, Calcined Gypsum 30 g, Amur Cork Tree 30 g, Sophora Flavescens 30 g, Borneol 10 g.

2.3 Preparation Method

The six ingredients are processed as follows:Grinding: Indigo Naturalis, Calcined Calamine, Calcined Gypsum, Sophora Flavescens, and Amur Cork Tree are pulverized into fine powder and passed through a 100-mesh sieve, then mixed uniformly. Borneol Processing: Borneol is finely ground and blended with the above powder. Base Preparation: 745.5 g of extra virgin olive oil is mixed with 74.5 g of beeswax, heated until melted, and cooled to 40-50 °C. Mixing: The powdered mixture is added to the melted base, stirred well, filled into containers, and sterilized by radiation.

2.4 Description

Based on observations of three batches (Batch Nos. 20140701, 20140702, 20140703), the ointment appears as a bluish-gray soft paste with a fragrant aroma.

2.5 Thin-Layer Chromatography (TLC) Identification

The TLC identification methods for Indigo Naturalis, Amur Cork Tree, and Sophora Flavescens in Qingshi Qingdai Ointment were established by referring to Appendix VI B of the Chinese Pharmacopoeia (2010 Edition, Part I). Factors such as extraction methods, developing systems, solvent ratios, sample loading volume, and other influencing parameters were optimized.

2.5.1 TLC Identification of Indigo Naturalis

Test Solution Preparation:Take 10 g of the ointment, mix with 5–6 g of diatomaceous earth, add 30 mL of 95% ethanol, ultrasonicate for 30 min, let stand overnight, filter, and evaporate the filtrate to dryness. Dissolve the residue in 1 mL of absolute ethanol as the test solution. Negative Control Solution (without Indigo Naturalis): Prepared similarly using an ointment sample lacking Indigo Naturalis. Reference Solution Preparation: Dissolve indirubin in chloroform to obtain a 0.5 mg/mL solution. TLC Procedure: Spot 5 μL of the reference solution, 6 μL of the test solution, and 6 μL of the negative control solution on the same silica gel G plate. Develop using toluene-chloroform-acetone (5:4:1) as the mobile phase. Dry the plate in air. The test solution should show a light purplish-red spot at the same position as the reference standard, with no interference from the negative control.

2.5.2 TLC Identification of Amur Cork Tree

Test Solution Preparation: Same as in Section 1.2.5.1.Negative Control Solution (without Amur Cork Tree):Prepared similarly using an ointment sample lacking Amur Cork Tree. Reference Solution Preparation: Dissolve berberine hydrochloride in absolute ethanol to obtain a 0.5 mg/mL solution. TLC Procedure: Spot 0.5 μL of each solution on the same silica gel G plate. Develop using toluene-ethyl acetate-isopropanol-methanol-concentrated ammonia (12:6:3:3:1) in an ammonia-saturated chamber. Dry the plate and examine under UV 365 nm. The test solution should show a yellow fluorescent spot at the same position as the reference standard, with no interference from the negative control.

2.5.3 TLC Identification of Sophora Flavescens

Test Solution Preparation: Same as in Section 1.2.5.1. Negative Control Solution (without Sophora Flavescens): Prepared similarly using an ointment sample lacking Sophora Flavescens. Reference Material Solution Preparation: Take 0.2 g of Sophora Flavescens reference material, add 20 mL of chloroform and 0.4 mL of concentrated ammonia, ultrasonicate for 30 min, filter, evaporate the filtrate, and dissolve the residue in 1 mL of absolute ethanol. TLC Procedure: Spot 4 μL of the reference material solution and 6 μL each of the test and negative control solutions on the same silica gel G plate. Develop using toluene-acetone-methanol (8:3:0.5) in an ammonia-saturated chamber (development distance: 12 cm). Dry the plate and spray with dilute Dragendorff’s reagent. The test solution should show an orange spot at the same position as the reference standard, with no interference from the negative control.

2.6 Tests

2.6.1 Fill Quantity

The labeled fill quantity of the product is 10 g. According to Appendix I R (Ointments) of the Chinese Pharmacopoeia (2010 Edition, Part I), three batches of samples were tested. The average fill quantity must not be less than the labeled quantity, and the fill quantity of each container must not be less than 93% of the labeled quantity. The results complied with the requirements (**Table S1**).

Table S1 Loading of 3 batches of samples (g)

| Batch number | 1 | 2 | 3 | Average loading |
| --- | --- | --- | --- | --- |
| 20140701 | 10.1 | 9.9 | 10.6 | 10.2 |
| 20140702 | 9.7 | 10.5 | 10.7 | 10.3 |
| 20140703 | 10.2 | 10.1 | 10.9 | 10.4 |

2.6.2 Particle Size

An appropriate amount of the ointment was spread into a thin layer (area equivalent to a coverslip) on three slides. Following Appendix IX E (Particle Size and Distribution Determination) of the Chinese Pharmacopoeia (2010 Edition, Part II), no particles larger than 180 μm were detected.

2.6.3 Microbial Limits

Sample Preparation:10 g of the ointment was mixed with 20 mL of sterile isopropyl myristate and shaken until uniformly dispersed. 100 mL of sterile pH 7.0 sodium chloride-peptone buffer was added, shaken, and allowed to stand for oil-water separation. The aqueous layer was collected as the 1:10 test solution. Further dilutions (1:100, 1:1000) were prepared by serial 10-fold dilution. Microbial Enumeration: Bacterial count: 1 mL of the 1:10 test solution was evenly distributed into 5 Petri dishes (0.2 mL per dish). Mold and yeast count: 1 mL of the 1:10 test solution was added to a Petri dish. Pathogen Testing: Staphylococcus aureus: 10 mL of the 1:10 test solution was added to 100 mL of nutrient broth medium. Pseudomonas aeruginosa: 10 mL of the 1:10 test solution was added to 100 mL of bile salt lactose medium. Acceptance Criteria (per 1 g of sample): Bacteria: ≤ 10,000 CFU Molds and yeasts: ≤ 100 CFU S. aureus and P. aeruginosa: Not detected

The test results met the specified requirements (**Table S2**).

Table S2 Microbiological limit of detection (cfu/g) for 3 batches of samples.

| Batch number | bacterial | Mould and yeast | Staphylococcus aureus | Pseudomonas aeruginosa |
| --- | --- | --- | --- | --- |
| 20140701 | 10.1 | 9.9 | 10.6 | 10.2 |
| 20140702 | 9.7 | 10.5 | 10.7 | 10.3 |
| 20140703 | 10.2 | 10.1 | 10.9 | 10.4 |

2.7 Assay

Indigo Naturalis is the principal medicinal component in this formula, primarily containing indigo and indirubin. Therefore, these two compounds were selected as quality control markers. An HPLC method was established based on the 2010 Edition of the Chinese Pharmacopoeia (Part I) to determine their contents.

2.7.1 Chromatographic Conditions

Column: Waters Symmetry Shield RP-18 (150 mm × 4.6 mm, 5 μm). Mobile phase: Methanol-water (65:35, v/v). Flow rate: 1.0 mL/min. Detection wavelength: 285 nm. Column temperature: 25 °C.

2.7.2 Reference Solution Preparation

Accurately weighed indigo and indirubin reference standards (dried to constant weight over phosphorus pentoxide) were dissolved in methanol-chloroform (8:2, v/v) to prepare a mixed solution containing: 235 μg/mL of indigo 2.08 μg/mL of indirubin.

2.7.3 Test Solution Preparation

1.0 g of the sample was accurately weighed and extracted with 50 mL of methanol-chloroform (8:2, v/v) under ultrasonication (140 W, 40 kHz, 30 min). After cooling to room temperature, the lost weight was replenished. The solution was stored at -4 °C for 2 h, then rapidly filtered. 25 mL of the filtrate was evaporated to dryness, and the residue was dissolved in methanol-chloroform (8:2, v/v) and transferred to a 5 mL brown volumetric flask.

2.7.4 Negative Control Solution Preparation

An ointment sample without Indigo Naturalis was prepared according to the formula and processed as in Section 1.2.7.3.

2.7.5 Specificity Test

Under the chromatographic conditions in Section 1.2.7.1, HPLC analysis of the reference standards, test solution, and negative control confirmed that no interfering peaks affected the determination of indigo and indirubin.

2.7.6 Linearity Study

Different volumes (4-14 μL for indirubin, 10-20 μL for indigo) of reference solutions were injected into the HPLC system. Calibration curves: Indirubin: Y = 6,958.8X-26.769 (r = 0.9996, n = 6) Indigo: Y = 41.581X-6.2381 (r = 0.9998, n = 6). Linear ranges: Indigo: 2.35-4.7 μg. Indirubin: 0.00832-0.2912 μg.

2.7.7 Precision Test

The reference solution (10 μL) was injected 6 times. RSD: Indirubin: 1.5%. Indigo: 1.3% The results met precision requirements (**Table S3**).

Table S3 Precision test

| Batch number | Indigo | | | Indirubin | | |
| --- | --- | --- | --- | --- | --- | --- |
| Peak area | Average | RSD (%) | Peak area | Average | RSD (%) |
| 1 | 117.3 | 115.6 | 1.3 | 82.2 | 109.5 | 1.5 |
| 2 | 115.4 | 78.3 |
| 3 | 116.8 | 81.4 |
| 4 | 114.7 | 79.8 |
| 5 | 113.9 | 80.1 |

2.7.8 Repeatability Test

Six sample replicates were prepared and analyzed (10 μL injection). RSD: Indigo: 2.5%. Indirubin: 2.9%. The method demonstrated good repeatability (**Table S4**).

Table S4 Repeatability test

| Batch number | Indigo | | | Indirubin | | |
| --- | --- | --- | --- | --- | --- | --- |
| Content (mg/g) | Average content (mg/g) | RSD (%) | Content (mg/g) | Average content (mg/g) | RSD (%) |
| 1 | 2.865 | 2.855 | 2.5 | 20.33 | 20.68 | 2.9 |
| 2 | 2.847 | 19.61 |
| 3 | 2.777 | 20.91 |
| 4 | 2.943 | 21.08 |
| 5 | 2.773 | 20.98 |
| 6 | 2.925 | 21.14 |

2.7.9 Stability Test

The same test solution was analyzed at 0, 2, 4, 6, 8, 10, 12, and 24 h. RSD of peak areas: Indigo: 1.6%. Indirubin: 1.3%. The solution remained stable for 24 h (**Table S5**).

Table S5 Stability tests

| Batch number | Indigo | | | Indirubin | | |
| --- | --- | --- | --- | --- | --- | --- |
| Peak area | Average | RSD (%) | Peak area | Average | RSD (%) |
| 1 | 118.2 | 115.3 | 1.6 | 110.5 | 108.6 | 1.3 |
| 2 | 116.3 | 109.5 |
| 3 | 116.9 | 109.6 |
| 4 | 115.4 | 109.1 |
| 5 | 114.6 | 108.6 |
| 6 | 113.5 | 107.7 |
| 7 | 114.2 | 107.2 |
| 8 | 113.2 | 106.4 |

2.7.10 Recovery Test

Six 0.5 g samples (with known content) were spiked with 6.0 mL of indigo and 5.0 mL of indirubin reference solutions, then processed as in Section 1.2.7.3. Average recovery: Indigo: 95.4% (RSD = 2.3%). Indirubin: 96.7% (RSD = 2.6%) (**Table S6**).

Table S6 Sample recovery test

| Batch number | Indigo | | | Indirubin | | |
| --- | --- | --- | --- | --- | --- | --- |
| Recovery  (%) | Mean recovery  (%) | RSD (%) | Recovery  (%) | Mean recovery  (%) | RSD (%) |
| 1 | 93.4 | 95.4 | 2.3 | 94.7 | 96.7 | 2.6 |
| 2 | 96.9 | 94.2 |
| 3 | 99.0 | 99.3 |
| 4 | 94.0 | 99.9 |
| 5 | 95.1 | 94.6 |
| 6 | 93.8 | 97.2 |

2.7.11 Sample Determination

Five batches of samples were analyzed. Average content: Indigo: 2.964 mg/g (RSD = 2.3%). Indirubin: 21.39 μg/g (RSD = 2.1%). (**Table S7**).

Table S7 Determination of indigo and indirubin in Qingshi anti-itch Ointment

| Batch number | Indigo | | | Indirubin | | |
| --- | --- | --- | --- | --- | --- | --- |
| Content (mg/g) | Average content (mg/g) | RSD(%) | Content (mg/g) | Average content (mg/g) | RSD(%) |
| 1 | 3.075 | 2.964 | 2.3 | 20.97 | 21.394 | 2.1 |
| 2 | 2.962 | 20.94 |
| 3 | 2.896 | 21.45 |
| 4 | 2.954 | 21.63 |
| 5 | 2.934 | 21.98 |
